# Supplementary material for: Exploring the role of gut microbiota in host feeding behavior among breeds in swine
Source: PubMed Central journal article supplement (PMC8722167; doi:10.1186/s12866-021-02409-6), 2022-01-03
Supplement: 12866_2021_2409_MOESM4_ESM.pdf [file 12866_2021_2409_MOESM4_ESM.pdf]

**Additional file 4.** Contrasts of estimates for feeding behavior traits among rooms during three time periods. Data are presented as least squares mean with the confidence interval. Colors represent different rooms (n = 8).

**A. Average Daily Feed Intake (g)**

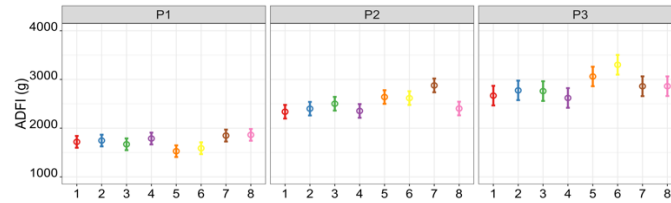

**B. Average Daily Occupation Time (s)**

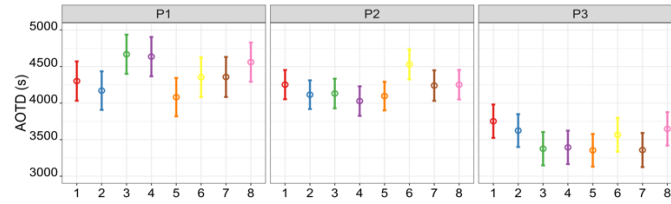

**C. Average Daily Feeding Rate (g/min)**

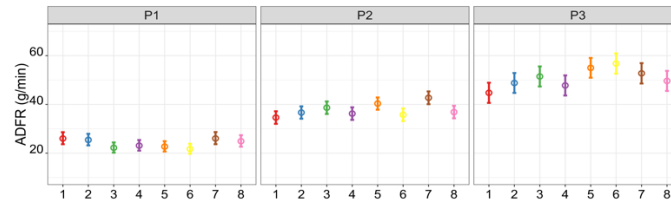

**D. Average Daily Number of Visits**

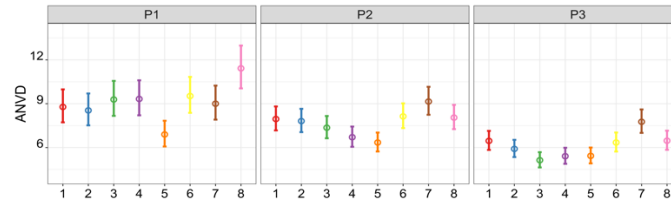

**E. Average Feed Intake per Visit (g)**

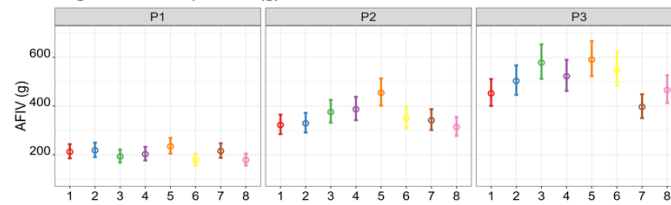

**F. Average Occupation Time per Visit (s)**

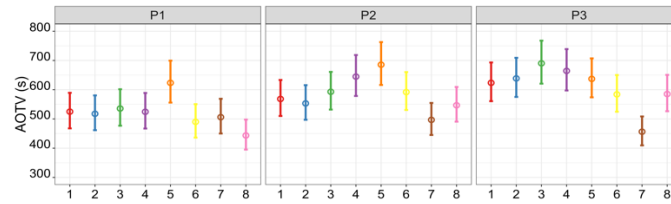

**G. Average Feeding Rate per Visit (g/min)**

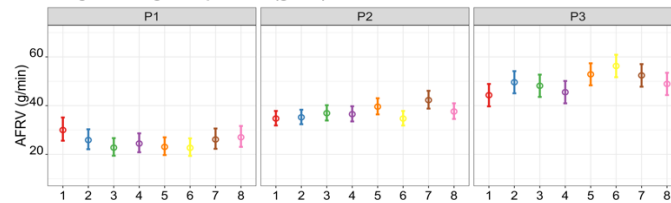

Room 1 2 3 4 5 6 7 8
