# Supplementary material for: Exploring the role of gut microbiota in host feeding behavior among breeds in swine
Source: PubMed Central journal article supplement (PMC8722167; doi:10.1186/s12866-021-02409-6), 2022-01-03
Supplement: 12866_2021_2409_MOESM5_ESM.pdf [file 12866_2021_2409_MOESM5_ESM.pdf]

**Additional file 5.** Summary of F values<sup>1</sup> and P-values from ANOVA of fixed effects on feeding behavior traits.

| Trait <sup>a</sup> | Fixed Effect |         |          |         |          |         |
|--------------------|--------------|---------|----------|---------|----------|---------|
|                    | P1           |         | P2       |         | P3       |         |
|                    | Breed        | Room    | Breed    | Room    | Breed    | Room    |
| ADFI (g)           | 1.50         | 3.78*** | 3.47*    | 6.88*** | 2.62     | 4.71*** |
| AOTD (s)           | 14.54***     | 2.49*   | 21.37*** | 2.46*   | 8.75***  | 1.89    |
| ADFR (g/min)       | 13.74***     | 2.37*   | 5.58**   | 4.18**  | 1.53     | 3.52**  |
| ANVD               | 10.66***     | 4.18*** | 17.27*** | 5.04*** | 20.12*** | 6.80*** |
| AFIV (g)           | 8.11***      | 2.05*   | 14.61*** | 3.57*** | 13.04*** | 4.16*** |
| AOTV (s)           | 19.57***     | 2.73**  | 13.63*** | 2.25*   | 10.90*** | 3.65*** |
| AFRV (g/min)       | 5.95**       | 1.48    | 2.47     | 2.51*   | 0.19     | 2.89**  |

<sup>1</sup> F values are calculated as the Mean Square Model divided by the Mean Square Residual in the ANOVA test from SAS.

<sup>a</sup> ADFI = average amount of feed consumed (g) daily during the test period; AOTD = average daily occupation time (s); ADFR = average daily feeding rate (g/min); ANVD = average daily number of visits to feeder; AFIV = average amount of feed consumed (g) per visit across testing period; AOTV = average occupation time (s) per visit across testing period; AFRV = average feeding rate (g/min) per visit across testing period.

\*  $P < .05$ ; \*\*  $P < .01$ ; \*\*\*  $P < .001$ .
