# Supplementary material for: Exploring the role of gut microbiota in host feeding behavior among breeds in swine
Source: PubMed Central journal article supplement (PMC8722167; doi:10.1186/s12866-021-02409-6), 2022-01-03
Supplement: 12866_2021_2409_MOESM6_ESM.pdf [file 12866_2021_2409_MOESM6_ESM.pdf]

**Additional file 6.** Comparisons of least squares means of microbiability across breeds, time points, and feeding behavior traits.

Table I

| Statistics              | Breed*            |                    |                    |
|-------------------------|-------------------|--------------------|--------------------|
|                         | DR                | LR                 | LW                 |
| Least Squares Means     | 0.18 <sup>a</sup> | 0.16 <sup>ab</sup> | 0.14 <sup>bc</sup> |
| 95% Confidence Interval | 0.16 - 0.19       | 0.14 - 0.18        | 0.13 - 0.16        |

\* DR = Duroc (n = 205); LR = Landrace (n = 226); LW = Large White (n = 220).  
Different letters a, b, and c denote P < 0.05 between means in the row.

Table II

| Statistics              | Sampling Time Point* |                    |                    |
|-------------------------|----------------------|--------------------|--------------------|
|                         | T1                   | T2                 | T3                 |
| Least Squares Means     | 0.14 <sup>a</sup>    | 0.16 <sup>ab</sup> | 0.18 <sup>bc</sup> |
| 95% Confidence Interval | 0.13 - 0.16          | 0.14 - 0.18        | 0.16 - 0.19        |

\* T1 = 73 days of age; T2 = 123 days of age; T3 = 158 days of age.  
Different letters a, b, and c denote P < 0.05 between means in the row.

Table III

| Statistics              | Feeding Behavior Trait* |                   |                   |                   |                   |                   |                   |
|-------------------------|-------------------------|-------------------|-------------------|-------------------|-------------------|-------------------|-------------------|
|                         | ADFI                    | AOTD              | ADFR              | ANVD              | AFIV              | AOTV              | AFRV              |
| Least Squares Means     | 0.22 <sup>a</sup>       | 0.17 <sup>b</sup> | 0.14 <sup>b</sup> | 0.16 <sup>b</sup> | 0.17 <sup>b</sup> | 0.14 <sup>b</sup> | 0.12 <sup>b</sup> |
| 95% Confidence Interval | 0.20 - 0.25             | 0.14 - 0.19       | 0.11 - 0.16       | 0.14 - 0.19       | 0.14 - 0.19       | 0.12 - 0.17       | 0.10 - 0.15       |

\* ADFI = average amount of feed consumed (g) daily during the test period; AOTD = average daily occupation time (s); ADFR = average daily feeding rate (g/min); ANVD = average daily number of visits to feeder; AFIV = average amount of feed consumed (g) per visit across testing period; AOTV = average occupation time (s) per visit across testing period; AFRV = average feeding rate (g/min) per visit across testing period.  
Different letters a, b, and c denote P < 0.05 between means in the row.
